# Supplementary material
Source: PubMed Central journal article supplement (PMC6097425)
Supplement: MD-009-C8MD00151K-s001.pdf [file MD-009-C8MD00151K-s001.pdf]

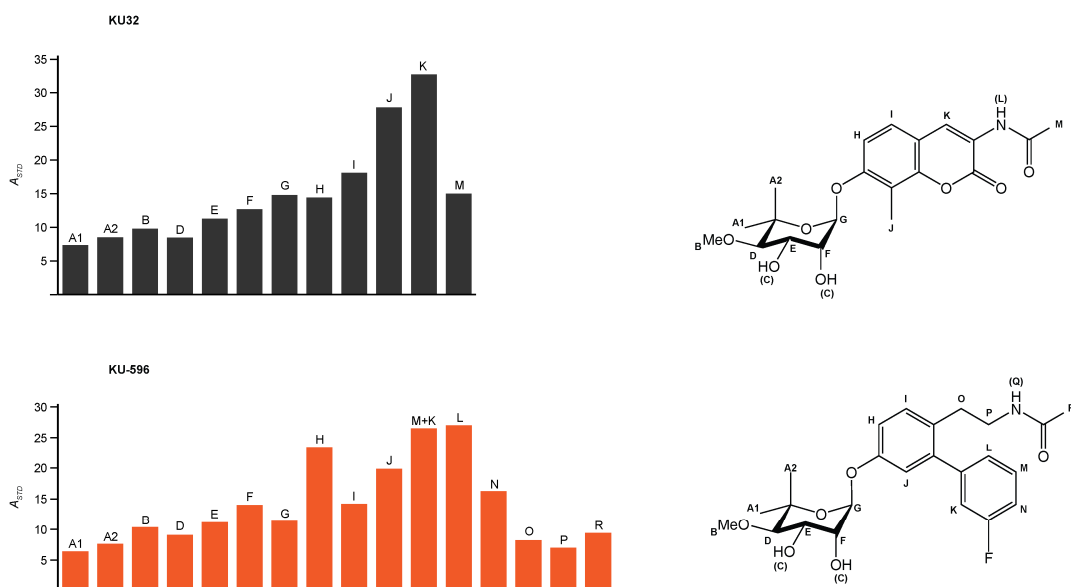

**Supplementary Figure 1.** Absolute STD effects for KU-32 (top) and KU-596 (bottom). For both experiments, the ligand and Hsp90 concentration was 770  $\mu\text{M}$  and 4.7  $\mu\text{M}$ , respectively, while a saturation transfer of 2 s was used.

(A)

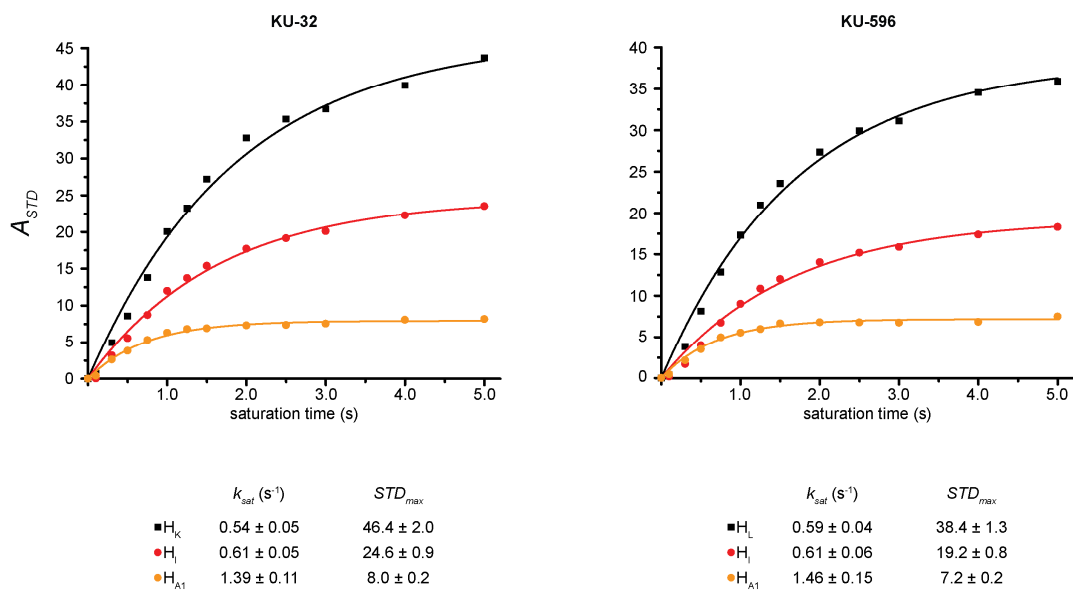

(B)

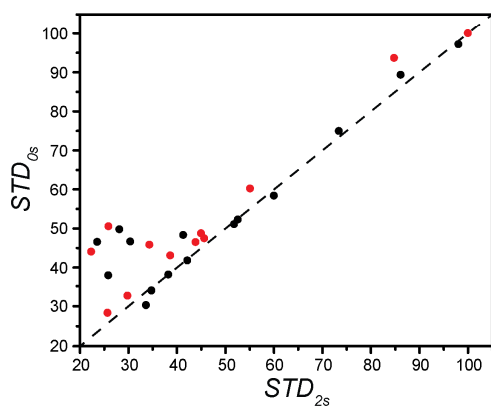

**Supplementary Figure 2.** Determination of  $STD_{0s}$ . (A) Representative examples of build-up curves obtained for protons of KU-32 (left) and KU-595 (right), from which  $k_{sat}$  and  $STD_{max}$  were determined by fitting to equation (2).  $STD_0$  was subsequently calculated as  $k_{sat} \times STD_{max}$ . (B) Comparison of relative  $STD_{2s}$  and  $STD_{0s}$  for each of the protons of KU-32 (red) and KU-596 (black), shown in Fig. 3 of the main text. For some signals (particularly of the methyl protons A1 and A2) STDs determined using a single saturation time (2s) are underestimated as compared to those determined as STDs at zero time.

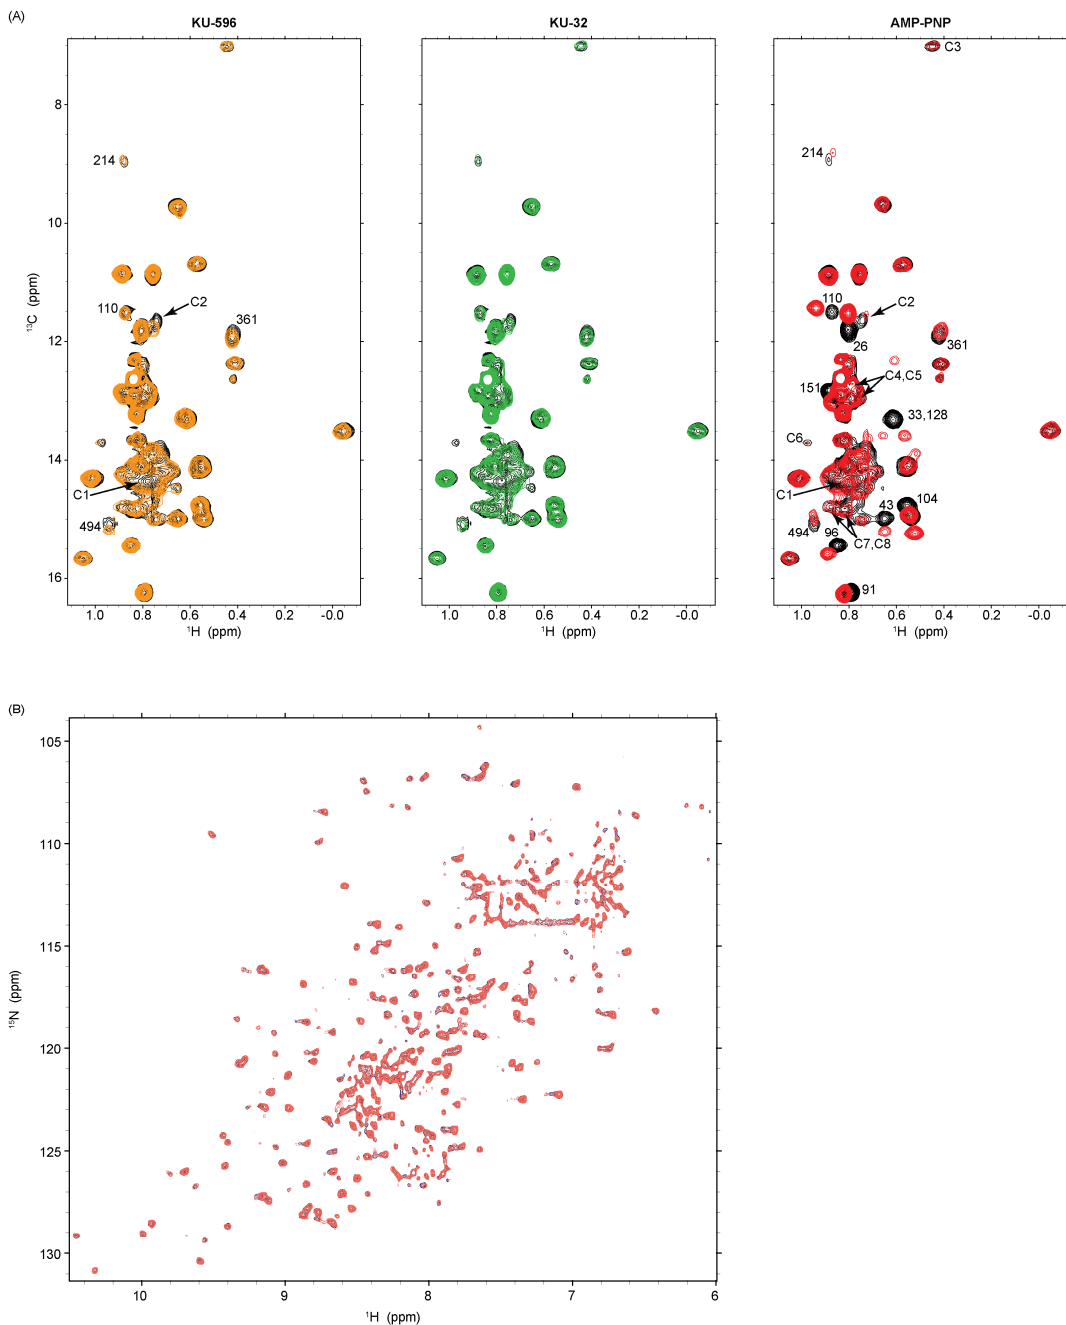

**Supplementary Figure 3.** The interaction of Hsp90 with small ligands followed by NMR. (A) Methyl-TROSY spectra of Hsp90 in the free-state (black), and in the presence of excess KU-596 (yellow), KU-32 (green) and AMP-PNP (red). Signals for which magnifications are provided in the main text (Fig. 4) are labelled on the spectrum of KU-596. A more extensive assignment is shown in the spectrum of AMP-PNP. (B) The TROSY  $^{15}\text{N}$  HSQC spectrum of N-Hsp90a (120  $\mu\text{M}$ ) acquired in the absence (blue) or presence of KU-596 (0.5 mM).
